# Supplementary material
Source: publisher site journal article supplement (https://www.dovepress.com/get_supplementary_file.php?f=513648.docx)
Supplement: Supplementary file 1 [file get_supplementary_file.php]

**supplementary table 1. Clinical characteristics of the acute phase and prognosis**

| Patient | Historical epidemiology | I[nitial symptom](javascript:;) | Other clinical features | Prognosis  /Time* | Final follow-up |
| --- | --- | --- | --- | --- | --- |
| 1 | crabs consumption | [cough](javascript:;) | spastic bilateral lower limb weakness, fever, [chest pain](javascript:;) | recovery/4W | 15M |
| 2 | crabs consumption,  drinking raw water | [headache](javascript:;) | spastic left lower limb weakness,  bladder dysfunction, subcutaneous nodules, fever, [dyspnea](javascript:;), vomiting, lethargy | recovery/13W | 36M |
| 3 | drinking raw water | [back pain](javascript:;) | spastic bilateral lower limb weakness,  sensory level, [cough](javascript:;), [chest pain](javascript:;) | recovery/8W | 36M |
| 4 | crabs consumption | asymmetric flaccid bilateral upper and lower limb weakness, fever | [dyspnea](javascript:;), bladder dysfunction, lower limb numbness | hemiparesis, urinary urgency/80W | 36M |
| 5 | [unknown](javascript:;) | [back pain](javascript:;) | flaccid bilateral lower limb weakness, sensory level | recovery/16W | 36M |
| 6 | drinking raw water | abdominal distension | flaccid bilateral lower limb weakness, fever | recovery/1W | 36M |
| 7 | [unknown](javascript:;) | [chest pain](javascript:;) | spastic bilateral lower limb weakness, lower limb numbness | recovery/24W | 36M |
| 8 | [unknown](javascript:;) | asymmetric sensory level | spastic bilateral lower limb weakness, [back pain](javascript:;), [abdominal pain](javascript:;) | monoplegia/3W | 36M |
| 9 | crabs consumption,  drinking raw water | [back pain](javascript:;) | asymmetric spastic bilateral lower limb weakness, loss of weight, asymmetric sensory level | recovery/24W | 36M |

Abbreviations: M=months; W=weeks.

* Time was defined as the interval from initiating treatment with praziquantel to reaching stable clinical status.

**supplementary table 2.** **Extroneural radiological findings of the patients**

| Patient | 1 | 2 | 3 | 4 | 5 | 6 | 7 | 8 | 9 |
| --- | --- | --- | --- | --- | --- | --- | --- | --- | --- |
| Extra-nervous imaging | pleural effusion,  pulmonary exudation,  pulmonary nodules,  lymphadenopathy, atelectasis | pleural effusion,  hepatomegaly,  splenomegaly | pleural effusion,  pulmonary nodules, pulmonary cavitation,  lymphadenopathy | pulmonary exudation, hepatic calcified foci | pleural effusion, pulmonary exudation, pericardial effusion | pleural effusion, pulmonary exudation, hepatic lesion | pleural effusion | pulmonary exudation, hepatic calcified foci | pleural effusion, pulmonary exudation, lymphadenopathy, atelectasis |
